# Supplementary material
Source: PubMed Central journal article supplement (PMC4170780)

**SUPPLEMENTARY FIGURES**

**Supplementary figure 1. Resting heart rate (by fifth) and the risk of death from any cause adjusted for age and sex ( $p < 0.001$  for trend) with unadjusted hazard ratio, without confidence interval, shown as red diamond.**

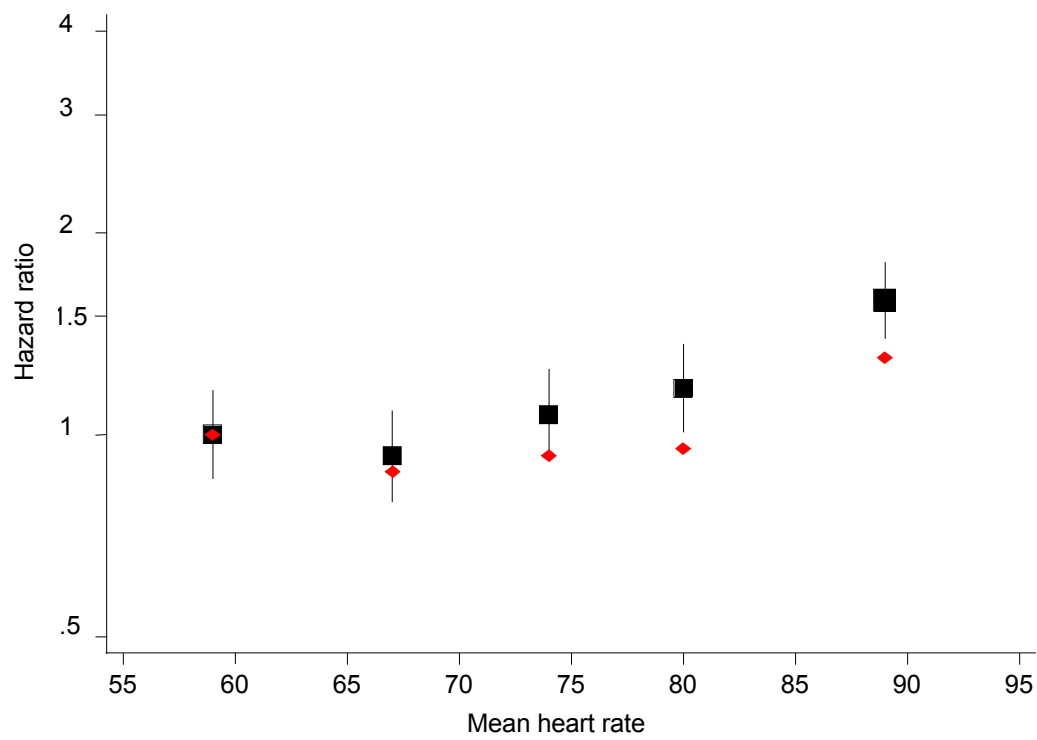

**Supplementary figure 2. Resting heart rate (by fifth) and the risk of cardiovascular death adjusted for age and sex ( $p < 0.001$  for trend) with unadjusted hazard ratio, without confidence interval, shown as red diamond.**

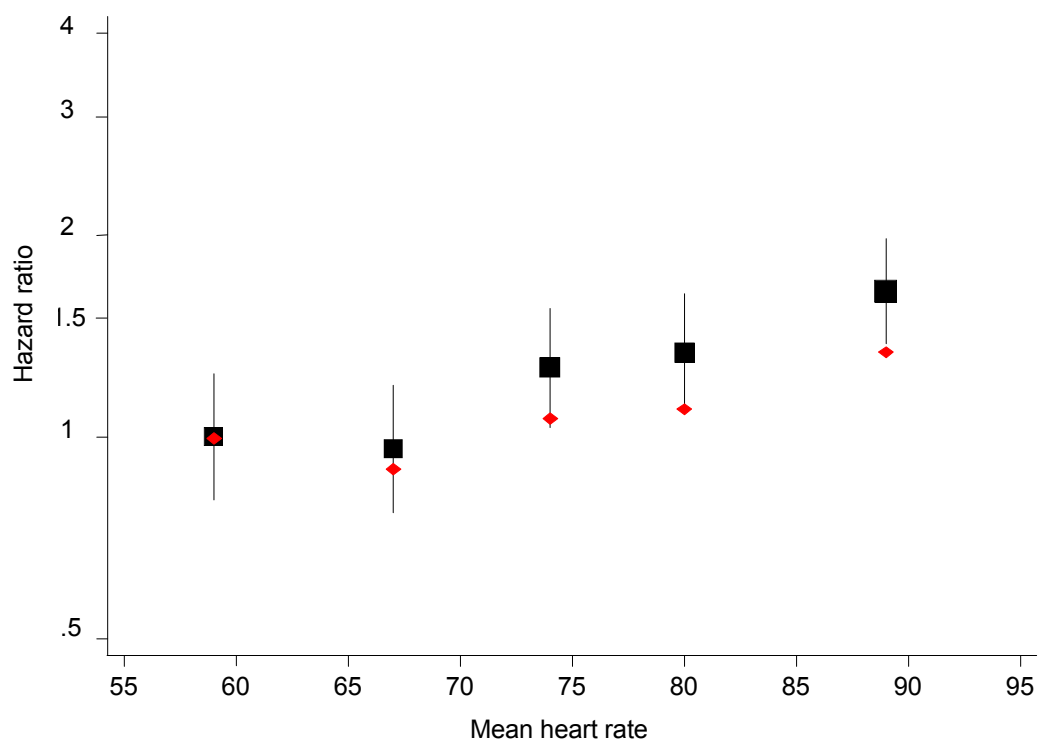

**Supplementary figure 3. Resting heart rate (by fifth) and the risk of major cardiovascular events ( $p=0.003$  for trend) adjusted for age and sex with unadjusted hazard ratio, without confidence interval, shown as red diamond.**

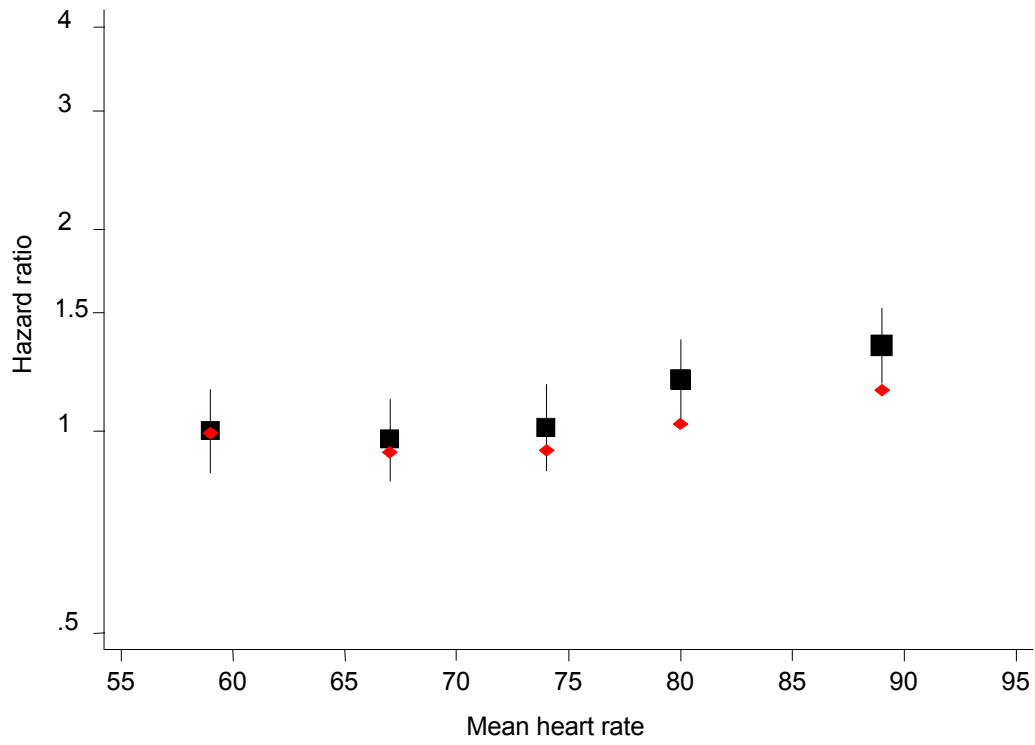

Supplement: NIHMS60241-supplement-01.pdf [file NIHMS60241-supplement-01.pdf]
